## PUBLISHER'S NOTE

# Expression of Concern: Distance-dependent cellular palmitoylation of de-novo-designed sequences and their translocation to plasma membrane subdomains. *J. Cell Sci.* (2002). 115, 3119-3130.

**Inmaculada Navarro-Lérida, Alberto Álvarez-Barrientos, Francisco Gavilanes and Ignacio Rodríguez-Crespo**

This Expression of Concern relates to the article 'Distance-dependent cellular palmitoylation of de-novo-designed sequences and their translocation to plasma membrane subdomains' by Inmaculada Navarro-Lérida, Alberto Álvarez-Barrientos, Francisco Gavilanes and Ignacio Rodríguez-Crespo (2002). *J. Cell Sci.* **115**, 3119-3130.

We have recently been made aware of concerns regarding some of the data in Fig. 1. After discussion with the corresponding author, Ignacio Rodríguez-Crespo, we have referred this matter to Dr Rodríguez-Crespo's institute. Journal of Cell Science is publishing this note to make readers aware of the issue, and we will provide further information once it has been resolved.

This course of action follows the advice set out by COPE (Committee on Publication Ethics), of which Journal of Cell Science is a member.

See also:

doi: 10.1242/jcs.209981

doi: 10.1242/jcs.209999

doi: 10.1242/jcs.210005
